# Supplementary material
Source: PubMed Central journal article supplement (PMC2259059)
Supplement: plntphys_pp.107.110742_3.pdf [file plntphys_pp.107.110742_3.pdf]

1 SUPPLEMENTAL FIGURE LEGENDS

2

3 Supplemental material Figure 1. Identified upregulated selenite-responsive genes ( $p <$   
4  $0.05$ , fold change  $>2$ ) that are categorized with biological function. (a) Genes that are  
5 specifically induced by selenite in Col-0. (b) Genes that are specifically induced by  
6 selenite in Ws-2. Numbers outside of pie-chart denote the gene number in each  
7 category.

8

9 Supplemental material Figure 2. Sensitivity to SA, ACC and MeJA in seedlings of Col-0  
10 and Ws-2. Seeds were germinated in the presence of various concentrations of (a) SA,  
11 (b) ACC and (c) MeJA for 7 days, and then root length was measured. The values  
12 shown are average  $\pm$  SD ( $n=20$ ). Different lowercase letters above each bar denote  
13 significant differences ( $p < 0.05$ ) according to Student's t-tests.

14
