# Supplementary material
Source: PubMed Central journal article supplement (PMC2259059)

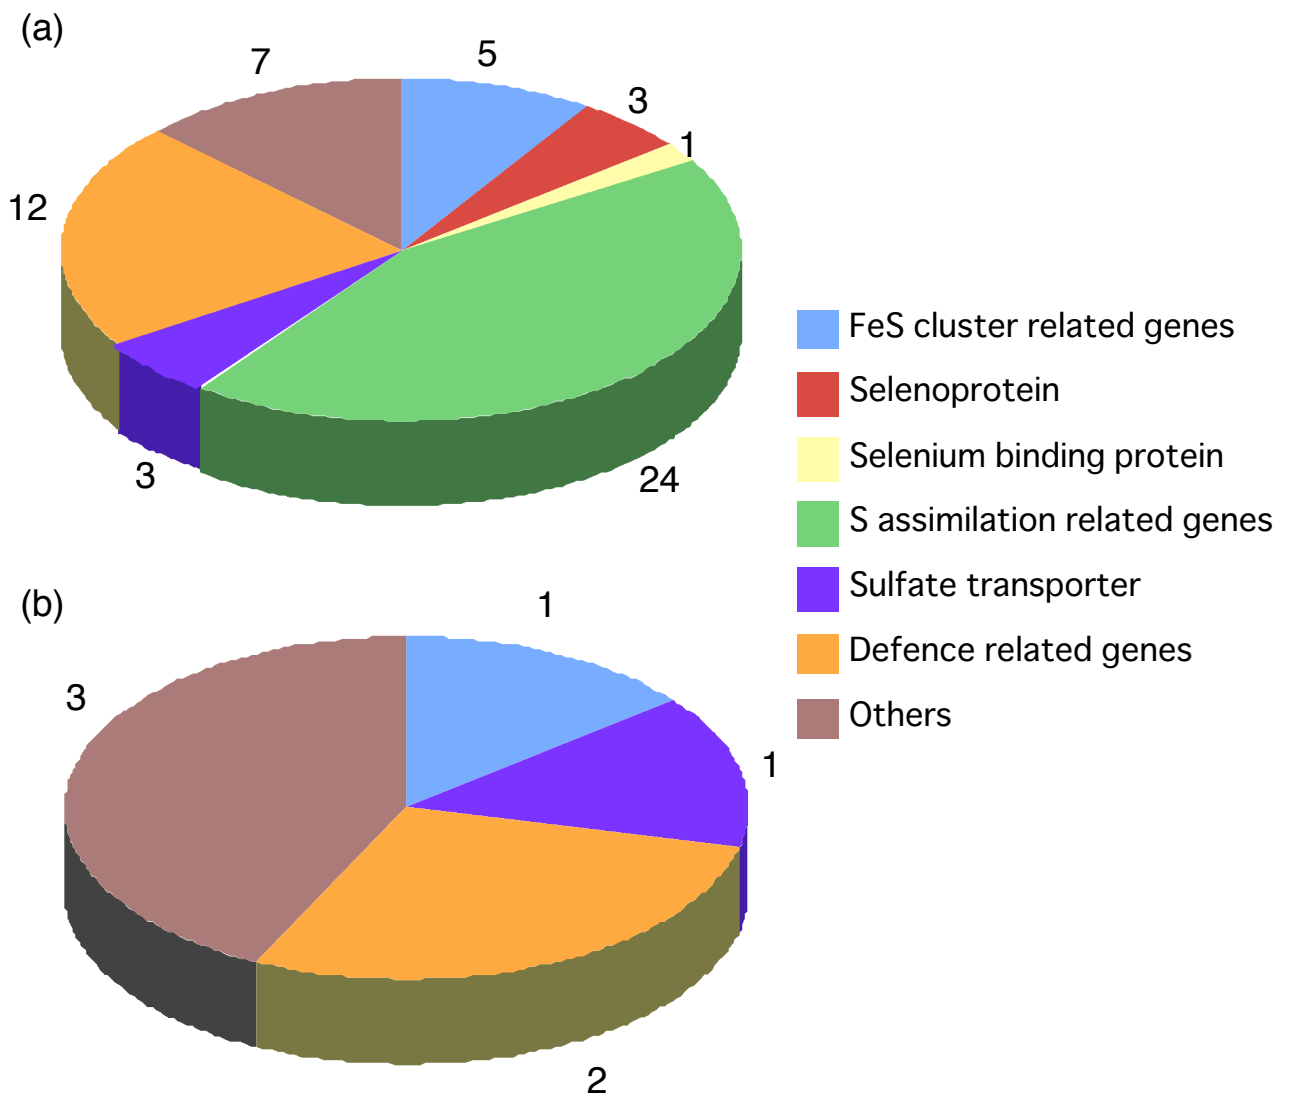

Supplemental material Figure 1

Supplement: plntphys_pp.107.110742_1.pdf [file plntphys_pp.107.110742_1.pdf]

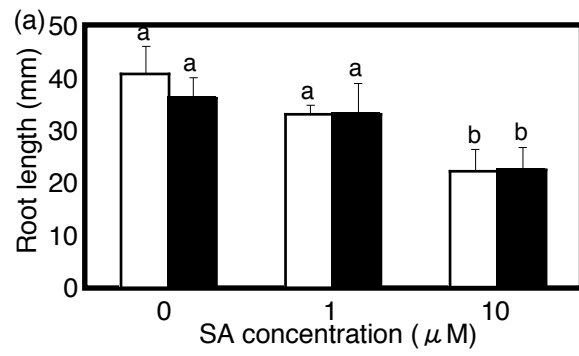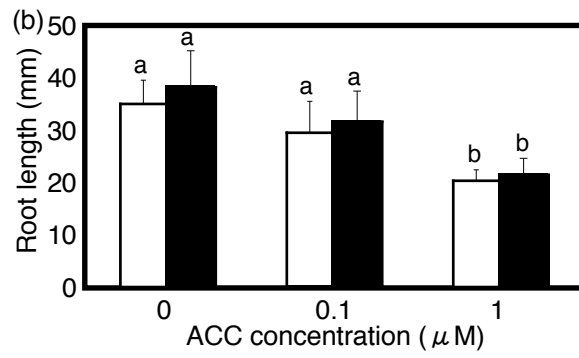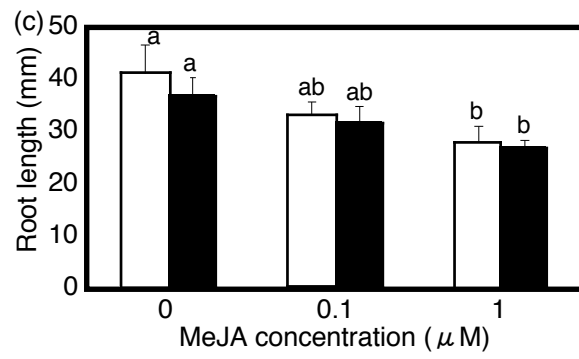

Supplemental material Figure 2

Supplement: plntphys_pp.107.110742_2.pdf [file plntphys_pp.107.110742_2.pdf]
